# Supplementary material for: High-precision ID-TIMS cassiterite U–Pb systematics using a low-contamination hydrothermal decomposition: implications for LA-ICP-MS and ore deposit geochronology
Source: Copernicus journal article supplement (doi:10.5194/gchron-2-425-2020), 2020-12-18
Supplement: Supplementary file 1 [file gchron-2-425-2020-supplement.zip]

Archive with 2 entries (2 files):
- gchron-2-425-2020-supplement-title-page.pdf
- Tapster and Bright Cassiterite Data Tables 19_12_19.xlsx
