# Supplementary material for: High-precision ID-TIMS cassiterite U–Pb systematics using a low-contamination hydrothermal decomposition: implications for LA-ICP-MS and ore deposit geochronology
Source: Copernicus journal article supplement (doi:10.5194/gchron-2-425-2020), 2020-12-18
Supplement: Supplementary file 1 [file gchron-2-425-2020-supplement.zip › gchron-2-425-2020-supplement-title-page.pdf]

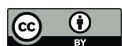

## *Supplement of*

# **High-precision ID-TIMS cassiterite U–Pb systematics using a low-contamination hydrothermal decomposition: implications for LA-ICP-MS and ore deposit geochronology**

**Simon Tapster and Joshua W. G. Bright**

*Correspondence to:* Simon Tapster ([simont@bgs.ac.uk](mailto:simont@bgs.ac.uk))

- [gchron-2-425-2020-supplement-title-page.pdf](#)
- [Tapster and Bright Cassiterite Data Tables 19\\_12\\_19.xlsx](#)

The copyright of individual parts of the supplement might differ from the CC BY 4.0 License.
