# Supplementary material for: High-precision ID-TIMS cassiterite U–Pb systematics using a low-contamination hydrothermal decomposition: implications for LA-ICP-MS and ore deposit geochronology
Source: Copernicus journal article supplement (doi:10.5194/gchron-2-425-2020), 2020-12-18
Supplement: Supplementary file 1 [file gchron-2-425-2020-supplement.zip › Tapster and Bright Cassiterite Data Tables 19_12_19.xlsx]

## Sheet: Cassiterite IDTIMS U-Pb
U-Pb isotopic data
							Compositional Parameters						Sample (Radiogenic + Initial Pb) Isotope Ratios						Radiogenic Isotope Ratios (Pbc corrected with model Pbc)									Isotopic Ages (Pbc corrected with model Pbc)
Sample	Crystal	Sub-sample	Sub-aliquot	Pre-treatment		Wt.	U	mol %	Pb*	Pbc	206Pb		238U		207Pb		corr. coef.		SK Pbc Corr	207Pb		207Pb		206Pb		corr.		207Pb		207Pb		206Pb
(Vein/parent)		Fragment	of fragment			mg	µg/g	206Pb*	Pbc	(pg)	204Pb		206Pb	% (2s)	206Pb	% (2s)	8/6-7/6		age (Ma)	206Pb	% (2s)	235U	% (2s)	238U	% (2s)	coef.		206Pb	± abs (2s)	235U	± abs (2s)	238U	± abs (2s)
				(a)		(b)	(c)	(e)	(e)	(e)	(f)		(j)	(h)	(j)	(h)			(d)	(g)	(h)	(g)	(h)	(g)	(h)			(i)	(h)	(i)	(h)	(i)	(h)
JIAN-1	C1	C1.1	C1.1.1	HF leached		0.875	8.57652	0.993092	35.6308	4.94298	2357.88		40.8411	0.104539	0.0548276	0.583264	-0.479181		155	0.0492238	0.131042	0.164937	0.212083	0.0243129	0.0988555	0.89622		155.826	3.06698	155.015	0.304896	154.962	0.15126
JIAN-1	C1	C1.2	C1.2.1	HF leached		0.875	6.07331	0.996837	79.1261	1.54912	5292.81		41.0028	0.104454	0.0511297	0.885099	-0.602589		155	0.0492537	0.116293	0.165161	0.192053	0.0243311	0.0892517	0.91377		157.25	2.72108	155.211	0.276421	155.077	0.136665
JIAN-1	C1	C1.3	C1.3.1	HF leached		0.875	11.9213	0.995737	57.3734	4.22312	3828.93		40.8992	0.107024	0.0527008	0.443649	-0.395419		155	0.049318	0.118024	0.165481	0.201897	0.0243465	0.104526	0.894603		160.289	2.76001	155.49	0.291074	155.175	0.160153
JIAN-1	C1	C1.4	C1.4.1	HF leached		0.875	1.27751	0.88294	1.33555	14.3452	137.991		35.9883	0.266943	0.152624	1.08987	-0.884299		155	0.0493327	0.99419	0.164423	1.05651	0.0241836	0.284296	0.347302		160.443	23.2464	154.567	1.51481	154.184	0.432746
SPG4	C1	C1.1	C1.1.1	HF leached		0.875	26.5293	0.999304	369.889	15.9086	23206.8		3.7128	0.12966	0.0961869	0.0802209	-0.614288		1535	0.0956081	0.08334	3.54656	0.191723	0.269158	0.129841	0.937412		1539.12	1.5675	1537.67	1.51855	1536.61	1.77509
SPG4	C1	C1.2	C1.2.1	HF leached		0.875	12.5127	0.998665	192.701	14.3961	12098.8		3.71263	0.144392	0.0966541	0.0943874	-0.471255		1535	0.0955474	0.0863196	3.54229	0.203785	0.269004	0.144671	0.932898		1537.93	1.6238	1536.71	1.61366	1535.83	1.97695
SPG4	C1	C1.3	C1.3.1	HF leached		0.875	4.53049	0.998676	194.948	5.15822	12286.4		3.70829	0.109147	0.0966387	0.10313	-0.599168		1535	0.0956154	0.0866895	3.54931	0.180567	0.269345	0.109359	0.938105		1539.26	1.63047	1538.28	1.43043	1537.56	1.4959
CH1	C1	C1.1	C1.1.1	HF leached		0.875	1.49961	0.813107	1.13578	46.8578	97.6902		18.1145	0.162807	0.200992	0.336789	-0.711998		285	0.052341	1.2814	0.32444	1.32729	0.0449765	0.395897	0.26304		298.455	29.2278	285.312	3.30139	283.711	1.09845
CH1	C1	C1.1	C1.1.2	HF leached		0.875	3.65804	0.965381	7.3104	17.9176	527.308		21.384	0.114956	0.079062	0.524035	-0.489938		285	0.0520228	0.372436	0.323988	0.431159	0.0451887	0.13274	0.566195		284.529	8.5162	284.966	1.0713	285.019	0.369961
CH1	C1	C1.1	C1.1.3	HF leached		0.875	1.79477	0.973581	9.64311	6.64603	690.69		21.6095	0.172807	0.071154	1.11398	-0.604043		285	0.0514892	0.365329	0.320341	0.444253	0.045143	0.148608	0.651164		260.901	8.38928	282.165	1.09443	284.737	0.413785
CH1	C1	C1.1	C1.1.4	HF leached		0.875	9.36814	0.970895	8.73991	38.4072	626.424		21.4852	0.210966	0.0747836	0.422772	-0.243816		285	0.051982	0.347372	0.324128	0.452463	0.0452233	0.21506	0.669565		283.768	7.94417	285.073	1.1246	285.232	0.599834
CH1	C1	C1.1	C1.1.5	Non-HF leached		0.875	2.42375	0.889448	2.11293	40.9885	165.148		19.7857	0.131601	0.140016	0.354678	-0.638692		285	0.0522698	0.783642	0.324274	0.842381	0.0450148	0.239435	0.378889		295.351	17.8842	285.185	2.09446	283.946	0.664871
CH1	C1	C1.1	C1.1.6	Non-HF leached		0.875	1.11906	0.0251994	0.516608	0	18.7314		0.642673	0.187369	0.836888	0.0993717	-0.341917		285	0.148653	90.0667	0.803378	70.3448	0.039214	62.2318	0.0809992		2269.45	1542.73	598.733	318.196	N/A	N/A
CH1	C1	C1.1	C1.1.7	Non-HF leached		0.875	2.76712	0.911983	2.71945	36.3058	207.428		20.301	0.166909	0.121934	0.382709	-0.44881		285	0.0521873	0.613428	0.323493	0.686132	0.0449774	0.225374	0.469738		291.746	14.0086	284.586	1.70287	283.715	0.62533
CH1	C1	C1.1	C1.1.8	Non-HF leached		0.875	2.00452	0.83092	1.29171	54.8872	107.984		18.6926	0.239623	0.186747	0.290574	-0.399225		285	0.0520678	1.16038	0.319471	1.22538	0.0445202	0.402962	0.321452		286.496	26.5241	281.496	3.01254	280.894	1.10719
CH1	C1	C1.2	C1.2.1	HF leached		0.875	0.964417	0.970546	8.62865	4.00235	619.242		21.5355	0.241801	0.0727858	1.99469	-0.775668		285	0.0520164	0.354361	0.32427	0.437462	0.0452335	0.166409	0.642145		284.25	8.1033	285.182	1.08768	285.295	0.464238
CH1	C1	C1.3	C1.3.1	HF leached		0.875	0.483239	0.954527	5.50162	3.1561	400.985		21.2022	0.38547	0.0830968	3.385	-0.944802		285	0.0521535	0.528434	0.325935	0.609716	0.0453463	0.146603	0.637702		290.269	12.0709	286.458	1.52183	285.991	0.409962
CH1	C1	C1.4	C1.4.1	HF leached		0.875	1.78848	0.96759	7.82961	8.2167	563.08		21.3666	0.146894	0.0766772	1.01277	-0.712234		285	0.0522003	0.303631	0.32643	0.375478	0.0453744	0.125673	0.68435		292.322	6.93319	286.837	0.938252	286.164	0.351642
CH2	C2.1	C2.1.1	C2.1.1.1	HF leached		0.875	2.02324	0.985766	18.153	4.02359	1281.43		21.6759	0.147016	0.0620703	1.14258	-0.63838		285	0.0520456	0.252823	0.326779	0.322067	0.045558	0.123461	0.692238		285.538	5.78005	287.104	0.805437	287.296	0.346787
CH2	C2.2	C2.2.1	C2.2.1.1	HF leached		0.875	2.75324	0.957577	5.91875	16.8568	430.303		20.9701	0.124834	0.0852713	0.579267	-0.587007		285	0.0521941	0.377032	0.328887	0.445687	0.0457215	0.135459	0.619764		292.054	8.60967	288.716	1.12	288.304	0.381795
CH2	C2.3	C2.3.1	C2.3.1.1	HF leached		0.875	1.7424	0.984548	16.6839	3.7572	1180.29		21.7084	0.150958	0.0628164	1.30744	-0.713888		285	0.0520397	0.203932	0.325943	0.280756	0.0454466	0.115215	0.780745		285.277	4.66253	286.464	0.70077	286.609	0.322868
CH2	C2.4	C2.4.1	C2.4.1.1	HF leached		0.875	1.39246	0.967927	7.90961	6.40113	568.905		21.1439	0.170841	0.0757641	1.30219	-0.760959		285	0.0519663	0.3652	0.32868	0.430449	0.0458929	0.136254	0.600855		282.062	8.35446	288.558	1.0812	289.361	0.385413
(a) Treatment of cassiterite after aqua reigia see methods section for full details
(b) Nominal fraction mass estimated from an extimated cube of cassiterite 500x500x500 µm and an assumed denisty of 7g/cm3 , likely to be within ±50%
(c) Nominal U concentrations caluclated from estimated mass
(d) Age of model Pbc value used to correct isotopic data ( Stacey and Kramers, 1975)
(e) Pb* and Pbc represent radiogenic and common Pb, respectively; mol % 206Pb* with respect to radiogenic, blank and initial common Pb.
(f) Measured ratio corrected for spike and fractionation only.
(g) Corrected for fractionation, spike, and common Pb; 0.5 ±0.25% pg of common Pb was assumed to be procedural blank with a composition defined below. Excess over blank was assigned to initial common Pb as defined in (d).
(h) Errors are 2-sigma, propagated using the algorithms of Schmitz and Schoene (2007)
(i) Calculations are based on the decay constants of Jaffey et al. (1971).
(j) Corrected for fractionation, spike, and blank Pb only.
Procedural blank Pb composition
206Pb/204Pb	18.099	1.5	± 1s [%]
207Pb/204Pb	15.545	0.879	± 1s [%]
208Pb/204Pb	37.824	1.076	± 1s [%]

## Sheet: Zircon CA-IDTIMS U-Pb
Zircon CA-ID-TIMS U-Pb data for Cligga Head
Porphyritic Granite Stock
	Dates (Ma)										Composition				Isotopic Ratios
	206Pb/
	238U	±2σ	206Pb/	±2σ	207Pb/	±2σ	207Pb/	±2σ	Corr.		Th/	Pb*	Pbc	Pb*/	206Pb/	206Pb/		207Pb/		207Pb/
Fraction	<Th> a	abs	238U b	abs	235U b	abs	206Pb b	abs	coef.	% disc c	U d	(pg) e	(pg) f	Pbc g	204Pb h	238U i	±2σ %	235U i	±2σ %	206Pb i	±2σ %
Zircon
z1	285.093	0.159709	284.994	0.159537	285.418	0.848102	288.894	7.4686	0.324117	1.35	0.076749	22.429	0.752582	29.8028	2035.82	0.0452015	0.0572258	0.324578	0.34086	0.0521026	0.325221
z2	289.802	0.394866	289.751	0.387971	290.046	3.17969	292.424	28.4535	0.15869	0.914133	0.722258	15.5875	2.11193	7.38072	437.645	0.045973	0.13693	0.330629	1.26029	0.0521831	1.2455
z3	288.891	0.419175	288.791	0.419028	289.062	3.00282	291.25	27.2346	0.0715336	0.84445	0.0561398	2.61543	0.363087	7.20333	508.752	0.0458173	0.148372	0.32934	1.19369	0.0521563	1.19186
z4	285.738	0.182907	285.638	0.182814	285.776	0.509985	286.907	4.4087	0.336207	0.442393	0.0601712	39.7872	0.832449	47.7953	3270.05	0.0453059	0.0654303	0.325045	0.204745	0.0520573	0.190122
z5	285.615	0.260622	285.513	0.260635	284.852	2.07049	279.432	19.0489	0.0711367	-2.17618	0.0338888	3.71526	0.343293	10.8224	760.367	0.0452856	0.0933233	0.323839	0.833584	0.0518874	0.831538
z6	285.234	0.157073	285.133	0.156987	285.686	0.744202	290.21	6.50381	0.340188	1.74937	0.056761	9.20798	0.291274	31.6127	2171.03	0.0452241	0.0562839	0.324928	0.298859	0.0521326	0.28283
z7	285.955	0.330311	285.855	0.330338	285.61	2.20007	283.605	19.6214	0.282801	-0.793248	0.062964	8.8239	0.919552	9.59587	670.497	0.0453411	0.118143	0.324828	0.883716	0.0519822	0.857212
z8	285.214	0.210805	285.114	0.210718	285.698	0.907572	290.476	7.91233	0.337386	1.84587	0.0647013	13.2455	0.402502	32.9078	2253.93	0.0452209	0.0755532	0.324943	0.364453	0.0521386	0.344828
z9	284.914	0.451311	284.814	0.451432	284.229	3.01087	279.422	26.5211	0.403695	-1.92941	0.0597474	5.05589	0.547557	9.23355	646.52	0.0451723	0.162028	0.323028	1.21448	0.0518872	1.15814
z10	290.688	0.403225	290.587	0.403377	290.078	2.65803	285.978	22.1127	0.650223	-1.61194	0.0547944	8.56696	0.719915	11.9	829.078	0.0461088	0.141966	0.330671	1.05343	0.0520361	0.96661
Rhyolite Poprhyry Dyke
	Dates (Ma)										Composition				Isotopic Ratios
	206Pb/
	238U	±2σ	206Pb/	±2σ	207Pb/	±2σ	207Pb/	±2σ	Corr.		Th/	Pb*	Pbc	Pb*/	206Pb/	206Pb/		207Pb/		207Pb/
Fraction	<Th> a	abs	238U b	abs	235U b	abs	206Pb b	abs	coef.	% disc c	U d	(pg) e	(pg) f	Pbc g	204Pb h	238U i	±2σ %	235U i	±2σ %	206Pb i	±2σ %
Zircon
z1	284.133	0.715172	284.052	0.714616	286.225	5.98978	304.006	53.9738	0.181621	6.56382	0.321666	15.5355	4.43794	3.50061	239.015	0.0450488	0.257163	0.325631	2.40148	0.0524487	2.36809
z2	283.23	0.487685	283.133	0.487699	284.362	3.81721	294.479	34.5487	0.20214	3.85295	0.108134	7.77917	1.37403	5.66156	397.827	0.0448998	0.176061	0.323201	1.53911	0.0522301	1.51303
z3	283.994	0.346587	283.897	0.346555	285.141	2.50852	295.355	22.5845	0.217372	3.87961	0.0913887	8.39651	1.02257	8.21121	571.542	0.0450236	0.124778	0.324217	1.00905	0.0522502	0.988917
z4	281.627	0.929678	281.543	0.92955	285.374	7.86357	316.879	70.6498	0.21116	11.1512	0.273499	4.21056	1.55947	2.7	190.737	0.0446421	0.337425	0.324521	3.16086	0.0527462	3.107
z5	283.176	0.534218	283.077	0.53428	283.766	3.3427	289.444	29.9294	0.277691	2.19981	0.0760233	7.89376	1.21458	6.49916	458.196	0.0448907	0.192914	0.322424	1.35024	0.0521151	1.30945
z6	284.548	0.336429	284.448	0.336478	285.854	2.56364	297.369	23.0506	0.212451	4.34496	0.0586457	8.1767	1.03436	7.90511	556.079	0.045113	0.120921	0.325147	1.02899	0.0522963	1.00972
z7	290.154	0.53579	290.061	0.535776	289.622	3.31883	286.087	28.3293	0.472548	-1.38888	0.148097	7.32672	1.0118	7.24126	498.246	0.0460233	0.188898	0.330074	1.3171	0.0520386	1.23865
z8	283.207	0.739304	283.108	0.73952	285.243	5.92002	302.772	53.2467	0.221892	6.49462	0.0734872	14.1277	4.15265	3.40208	248.582	0.0448958	0.266993	0.324349	2.38058	0.0524203	2.33566
a Corrected for initial Th/U disequilibrium using radiogenic 208Pb and Th/U[magma] = 1.43 ± 1 (1s)
b Isotopic dates calculated using the decay constants λ238 = 1.55125E-10 and λ235 = 9.8485E-10 (Jaffey et al. 1971).
c % discordance = 100 - (100 * (206Pb/238U date) / (207Pb/206Pb date))
d Th contents calculated from radiogenic 208Pb and the 230Th-corrected 206Pb/238U date of the sample, assuming concordance between the U-Pb and Th-Pb systems.
e Total mass of radiogenic Pb.
f Total mass of common Pb.
g Ratio of radiogenic Pb (including 208Pb) to common Pb.
h Measured ratio corrected for fractionation and spike contribution only.
i Measured ratios corrected for fractionation, tracer and blank.

## Sheet: Cassiterite decomposition data
Note: Mass change in beaker due to Br2 diffusion and weighing uncertainty was found to be ±0.00154 g (2s), and may thus result in negative mass changes and apparent rate when the amount of cassiterite decomposed was less than this
						mass (g )
Temperature (°C)	Run ID	Sample type	Step	Time (h)		Repeat 1	Repeat 2	Repeat 3	mean	1SD	%RSD	Mass of sample (g)	Mass change (g)	Integrated step rate of cassiterite decomposition (g/h)
210	CASNIG-C-210-1	Crushed	Empty			12.0707	12.0709	12.0709	12.0708	0.000105987	0.000878046
210	CASNIG-C-210-1	Crushed	Sample mass	0		12.0867	12.0862	12.0863	12.0864	0.000223681	0.00185069	0.01556
210	CASNIG-C-210-1	Crushed	Dissolution 1	12		12.0842	12.0836	12.0837	12.0838	0.000341174	0.0028234	0.0129967	0.00256333	0.000213611
210	CASNIG-C-210-1	Crushed	Dissolution 2	24		12.0817	12.0817	12.0816	12.0817	6.1101e-05	0.000505733	0.01085	0.00214667	0.000178889
210	CASNIG-C-210-1	Crushed	Dissolution 3	36		12.0795	12.0794	12.0794	12.0794	3.05505e-05	0.000252914	0.00859333	0.00225667	0.000188056
210	CASNIG-C-210-1	Crushed	Dissolution 4	48		12.0763	12.0765	12.0763	12.0764	7.81025e-05	0.000646738	0.00553667	0.00305667	0.000254722
210	CASNIG-C-210-1	Crushed	Dissolution 5	60		12.078	12.078	12.078	12.078	1.52753e-05	0.000126471	0.0072	-0.00166333	-0.000138611
210	CASNIG-C-210-1	Crushed	Dissolution 6	72		12.0763	12.0762	12.0762	12.0763	5.7735e-06	4.78087e-05	0.00542	0.00178	0.000148333
210	CASNIG-C-210-2	Crushed	Empty			12.2038	12.2038	12.2038	12.2038	3.05505e-05	0.000250336
210	CASNIG-C-210-2	Crushed	Sample mass	0		12.2231	12.2228	12.2227	12.2229	0.000158219	0.00129445	0.0190633
210	CASNIG-C-210-2	Crushed	Dissolution 1	12		12.219	12.2187	12.219	12.2189	0.000183394	0.0015009	0.0150933	0.00397	0.000330833
210	CASNIG-C-210-2	Crushed	Dissolution 2	24		12.216	12.2159	12.2161	12.216	7.2111e-05	0.0005903	0.0121867	0.00290667	0.000242222
210	CASNIG-C-210-2	Crushed	Dissolution 3	36		12.2126	12.2126	12.2121	12.2124	0.000277308	0.00227071	0.00861667	0.00357	0.0002975
210	CASNIG-C-210-2	Crushed	Dissolution 4	48		12.2128	12.2124	12.2124	12.2125	0.000210792	0.00172603	0.00870333	-8.66667e-05	-7.22222e-06
210	CASNIG-C-210-2	Crushed	Dissolution 5	60		12.2114	12.2111	12.2113	12.2112	0.000169214	0.00138572	0.00742333	0.00128	0.000106667
210	CASNIG-C-210-2	Crushed	Dissolution 6	72		12.2115	12.2114	12.211	12.2113	0.000277909	0.00227583	0.00752333	-0.0001	-8.33333e-06
220	CASNIG-C-220-1	Crushed	Empty			12.0762	12.0767	12.0763	12.0764	0.000275923	0.00228481
220	CASNIG-C-220-1	Crushed	Sample mass	0		12.0874	12.0875	12.0875	12.0875	2.51661e-05	0.0002082	0.01108
220	CASNIG-C-220-1	Crushed	Dissolution 1	12		12.0834	12.0833	12.0834	12.0834	2.51661e-05	0.000208271	0.00699	0.00409	0.000340833
220	CASNIG-C-220-1	Crushed	Dissolution 2	24		12.0799	12.0803	12.0805	12.0802	0.000275923	0.00228408	0.00385667	0.00313333	0.000261111
220	CASNIG-C-220-1	Crushed	Dissolution 3	36		12.0796	12.0792	12.0793	12.0794	0.000194679	0.00161167	0.00299333	0.000863333	7.19444e-05
220	CASNIG-C-220-2	Crushed	Empty			12.2077	12.2076	12.2077	12.2076	7.0946e-05	0.00058116
220	CASNIG-C-220-2	Crushed	Sample mass	0		12.2152	12.2152	12.2153	12.2152	4.04145e-05	0.000330853	0.0076
220	CASNIG-C-220-2	Crushed	Dissolution 1	12		12.2151	12.2158	12.2158	12.2156	0.000389744	0.00319055	0.00791333	-0.000313333	-2.61111e-05
220	CASNIG-C-220-2	Crushed	Dissolution 2	24		12.2129	12.2131	12.213	12.213	0.000120139	0.000983695	0.00537	0.00254333	0.000211944
220	CASNIG-C-220-2	Crushed	Dissolution 3	36		12.213	12.2131	12.213	12.213	2.51661e-05	0.000206059	0.00539	-2e-05	-1.66667e-06
220	CASNIG-C-220-3	Crushed	Empty			12.0786	12.0792	12.0787	12.0788	0.000325115	0.00269161
220	CASNIG-C-220-3	Crushed	Sample mass	0		12.0853	12.0853	12.0854	12.0853	4.50925e-05	0.000373118	0.00646667
220	CASNIG-C-220-3	Crushed	Dissolution 1	12		12.082	12.0815	12.0816	12.0817	0.000273191	0.00226119	0.00286667	0.0036	0.0003
220	CASNIG-C-220-3	Crushed	Dissolution 2	24		12.0818	12.0817	12.0816	12.0817	9.07377e-05	0.000751035	0.00284667	2e-05	1.66667e-06
220	CASNIG-C-220-3	Crushed	Dissolution 3	36		12.0802	12.0802	12.0807	12.0804	0.000257358	0.00213038	0.00152333	0.00132333	0.000110278
220	CASNIG-C-220-3	Crushed	Dissolution 4	48		12.0794	12.0794	12.0793	12.0793	6.4291e-05	0.00053224	0.000483333	0.00104	8.66667e-05
220	CASNIG-C-220-4	Crushed	Empty			12.2131	12.2127	12.2127	12.2128	0.00021166	0.0017331
220	CASNIG-C-220-4	Crushed	Sample mass	0		12.2175	12.218	12.2177	12.2177	0.000237136	0.00194092	0.00486667
220	CASNIG-C-220-4	Crushed	Dissolution 1	12		12.2129	12.2128	12.2128	12.2128	4.58258e-05	0.000375227	-2e-05	0.00488667	0.000407222
220	CASNIG-C-220-4	Crushed	Dissolution 2	24		12.2139	12.2139	12.2137	12.2138	7.93725e-05	0.000649858	0.00099	-0.00101	-8.41667e-05
220	CASNIG-C-220-4	Crushed	Dissolution 3	36		12.2125	12.2126	12.2127	12.2126	0.00012	0.000982593	-0.00024	0.00123	0.0001025
220	CASNIG-C-220-4	Crushed	Dissolution 4	48		12.2142	12.2139	12.2141	12.214	0.000136504	0.0011176	0.00119667	-0.00143667	-0.000119722
230	CASNIG-C-230-1	Crushed	Empty			16.5938	16.5936	16.5935	16.5936	0.000127671	0.0007694
230	CASNIG-C-230-1	Crushed	Sample mass	0		16.6134	16.6132	16.6133	16.6133	0.000105357	0.00063417	0.01966
230	CASNIG-C-230-1	Crushed	Dissolution 1	12		16.6055	16.6054	16.6055	16.6055	8.32666e-05	0.000501441	0.0118433	0.00781667	0.000651389
230	CASNIG-C-230-1	Crushed	Dissolution 2	24		16.6024	16.6022	16.6025	16.6023	0.000161658	0.000973706	0.00871333	0.00313	0.000260833
230	CASNIG-C-230-1	Crushed	Dissolution 3	36		16.6015	16.6015	16.6012	16.6014	0.000182483	0.0010992	0.00776	0.000953333	7.94444e-05
230	CASNIG-C-230-2	Crushed	Empty			11.4232	11.4234	11.4235	11.4234	0.000172434	0.00150948
230	CASNIG-C-230-2	Crushed	Sample mass	0		11.4389	11.4389	11.439	11.4389	6.4291e-05	0.000562036	0.01558
230	CASNIG-C-230-2	Crushed	Dissolution 1	12		11.4302	11.4308	11.4309	11.4306	0.000368284	0.0032219	0.00727667	0.00830333	0.000691944
230	CASNIG-C-230-2	Crushed	Dissolution 2	24		11.4283	11.4286	11.4287	11.4285	0.000212211	0.00185685	0.00515667	0.00212	0.000176667
230	CASNIG-C-230-2	Crushed	Dissolution 3	36		11.4285	11.4284	11.4285	11.4285	6.1101e-05	0.000534637	0.00513	2.66667e-05	2.22222e-06
210	CH-C-210-1	Crushed	Empty			11.4285	11.4284	11.4285	11.4285	6.1101e-05	0.000534637
210	CH-C-210-1	Crushed	Sample mass	0		11.463	11.4631	11.4631	11.4631	3.60555e-05	0.000314536	0.0345833
210	CH-C-210-1	Crushed	Dissolution 1	12		11.4387	11.4387	11.4387	11.4387	1.52753e-05	0.00013354	0.0102167	0.0243667	0.00203056
210	CH-C-210-1	Crushed	Dissolution 2	24		11.4321	11.4322	11.4322	11.4322	5.68624e-05	0.000497389	0.00368667	0.00653	0.000544167
210	CH-C-210-1	Crushed	Dissolution 3	36		11.4293	11.429	11.429	11.4291	0.000173205	0.00151548	0.000583333	0.00310333	0.000258611
210	CH-C-210-1	Crushed	Dissolution 4	48		11.4281	11.4283	11.4282	11.4282	0.000100167	0.000876487	-0.000313333	0.000896667	7.47222e-05
210	CH-C-210-2	Crushed	Empty			11.4267	11.4261	11.4266	11.4265	0.000301054	0.00263471
210	CH-C-210-2	Crushed	Sample mass	0		11.4429	11.4432	11.4427	11.4429	0.00025697	0.00224566	0.01648
210	CH-C-210-2	Crushed	Dissolution 1	12		11.4371	11.437	11.437	11.4371	2.64575e-05	0.000231331	0.0106033	0.00587667	0.000489722
210	CH-C-210-2	Crushed	Dissolution 2	24		11.433	11.4335	11.4333	11.4333	0.000245832	0.00215014	0.00683	0.00377333	0.000314444
210	CH-C-210-2	Crushed	Dissolution 3	36		11.4312	11.4309	11.4309	11.431	0.000168622	0.00147513	0.00453	0.0023	0.000191667
210	CH-W-210-1	Whole	Empty			16.6015	16.6015	16.6012	16.6014	0.000182483	0.0010992
210	CH-W-210-1	Whole	Sample mass	0		16.6219	16.622	16.622	16.622	2.51661e-05	0.000151403	0.0205833
210	CH-W-210-1	Whole	Dissolution 1	12		16.6197	16.6199	16.62	16.6199	0.000138684	0.00083445	0.0184633	0.00212	0.000176667
210	CH-W-210-1	Whole	Dissolution 2	24		16.6188	16.6188	16.6187	16.6188	6.65833e-05	0.000400651	0.0173767	0.00108667	9.05556e-05
210	CH-W-210-1	Whole	Dissolution 3	36		16.6176	16.6178	16.6177	16.6177	6.50641e-05	0.000391535	0.0163033	0.00107333	8.94444e-05
210	CH-W-210-1	Whole	Dissolution 4	48		16.6167	16.6167	16.6167	16.6167	2e-05	0.000120361	0.01529	0.00101333	8.44444e-05
210	CH-W-210-1	Whole	Dissolution 5	60		16.6163	16.6163	16.6163	16.6163	1.52753e-05	9.19293e-05	0.0149167	0.000373333	3.11111e-05
210	CH-W-210-2	Whole	Empty			16.5975	16.5978	16.5972	16.5975	0.000255016	0.00153647
210	CH-W-210-2	Whole	Sample mass	0		16.6241	16.6244	16.6123	16.6203	0.00690375	0.0415381	0.0227667
210	CH-W-210-2	Whole	Dissolution 1	12		16.6177	16.6176	16.6176	16.6176	5.03322e-05	0.000302885	0.0201233	0.00264333	0.000220278
210	CH-W-210-2	Whole	Dissolution 2	24		16.6171	16.617	16.6171	16.6171	5.7735e-06	3.47444e-05	0.0195533	0.00057	4.75e-05
210	CH-W-210-2	Whole	Dissolution 3	36		16.6152	16.615	16.615	16.6151	9.07377e-05	0.000546117	0.0175733	0.00198	0.000165
230	CH-C-230-1	Crushed	Empty			11.4275	11.4273	11.4274	11.4274	7.2111e-05	0.000631037
230	CH-C-230-1	Crushed	Sample mass	0		11.4494	11.4494	11.4496	11.4495	0.000161658	0.00141193	0.0220633
230	CH-C-230-1	Crushed	Dissolution 1	12		11.4354	11.4355	11.4355	11.4355	2.08167e-05	0.000182036	0.00807667	0.0139867	0.00116556
230	CH-C-230-1	Crushed	Dissolution 2	24		11.4338	11.4339	11.4339	11.4339	5.56776e-05	0.000486954	0.00648	0.00159667	0.000133056
230	CH-C-230-1	Crushed	Dissolution 3	36		11.4325	11.4322	11.4323	11.4323	0.000111505	0.000975346	0.00494333	0.00153667	0.000128056
230	CH-C-230-1	Crushed	Dissolution 4	48		11.4319	11.4316	11.4317	11.4317	0.000160104	0.00140052	0.00433667	0.000606667	5.05556e-05
230	CH-C-230-2	Crushed	Empty			12.1147	12.1147	12.1148	12.1147	7e-05	0.000577809
230	CH-C-230-2	Crushed	Sample mass	0		12.126	12.126	12.1261	12.1261	5.56776e-05	0.000459157	0.01133
230	CH-C-230-2	Crushed	Dissolution 1	12		12.1165	12.1165	12.1165	12.1165	1e-05	8.25322e-05	0.00176	0.00957	0.0007975
230	CH-C-230-2	Crushed	Dissolution 2	24		12.1137	12.1138	12.114	12.1138	0.000117189	0.0009674	-0.000893333	0.00265333	0.000221111
230	CH-C-230-2	Crushed	Dissolution 3	36		12.1134	12.1135	12.1135	12.1134	8.5049e-05	0.000702104	-0.00128333	0.00039	3.25e-05
230	CH-W-230-1	Whole	Empty			16.5784	16.5988	16.5985	16.5919	0.0116804	0.0703983
230	CH-W-230-1	Whole	Sample mass	0		16.6154	16.6158	16.6159	16.6157	0.000263122	0.00158358	0.0238067
230	CH-W-230-1	Whole	Dissolution 1	12		16.6198	16.6194	16.6193	16.6195	0.000285365	0.00171705	0.02763	-0.00382333	-0.000318611
230	CH-W-230-1	Whole	Dissolution 2	24		16.62	16.6197	16.6198	16.6198	0.000111355	0.000670014	0.0279533	-0.000323333	-2.69444e-05
230	CH-W-230-1	Whole	Dissolution 3	36		16.6184	16.6183	16.6184	16.6184	2.08167e-05	0.000125263	0.02647	0.00148333	0.000123611
230	CH-W-230-1	Whole	Dissolution 4	48		16.6168	16.6168	16.6168	16.6168	1.32791e-05	7.99134e-05	0.024911	0.001559	0.000129917
230	CH-W-230-2	Whole	Empty			16.5505	16.5502	16.5503	16.5504	0.000149778	0.000904981
230	CH-W-230-2	Whole	Sample mass	0		16.5591	16.5593	16.5593	16.5593	0.00010583	0.000639099	0.00890667
230	CH-W-230-2	Whole	Dissolution 1	12		16.559	16.559	16.559	16.559	3.78594e-05	0.000228633	0.00867	0.000236667	1.97222e-05
230	CH-W-230-2	Whole	Dissolution 2	24		16.5576	16.5576	16.5576	16.5576	2.08167e-05	0.000125723	0.00724333	0.00142667	0.000118889
230	CH-W-230-2	Whole	Dissolution 3	36		16.5571	16.5571	16.5575	16.5572	0.000219317	0.0013246	0.00685667	0.000386667	3.22222e-05
230	CH-W-230-3	Whole	Empty			16.6057	16.6056	16.6057	16.6057	2.51661e-05	0.000151551
230	CH-W-230-3	Whole	Sample mass	0		16.6167	16.6167	16.6167	16.6167	3.51188e-05	0.000211346	0.01106
230	CH-W-230-3	Whole	Dissolution 1	12		16.6157	16.6158	16.616	16.6158	0.000138684	0.000834651	0.01018	0.00088	7.33333e-05
230	CH-W-230-3	Whole	Dissolution 2	24		16.6165	16.6164	16.6164	16.6164	3.21455e-05	0.000193456	0.0107567	-0.000576667	-4.80556e-05
230	CH-W-230-3	Whole	Dissolution 3	36		16.6147	16.6148	16.6147	16.6147	5.2915e-05	0.000318483	0.00906333	0.00169333	0.000141111
220	CASNIG-C-220-5	Crushed	Empty			16.586			16.586
220	CASNIG-C-220-5	Crushed	Sample mass	0		16.6148			16.6148			0.02878
220	CASNIG-C-220-5	Crushed	Dissolution 1	96		16.6129			16.6129			0.02688	0.0019	1.97917e-05
220	CASNIG-C-220-5	Crushed	Dissolution 2	192		16.6109			16.6109			0.02495	0.00193	2.01042e-05
220	CASNIG-C-220-5	Crushed	Dissolution 3	288		16.6082			16.6082			0.02219	0.00276	2.875e-05
220	CASNIG-C-220-5	Crushed	Dissolution 4	432		16.6036			16.6036			0.01768	0.00451	4.69792e-05
220	CASNIG-C-220-6	Crushed	Empty			12.067			12.067
220	CASNIG-C-220-6	Crushed	Sample mass	0		12.088			12.088			0.02105
220	CASNIG-C-220-6	Crushed	Dissolution 1	96		12.0859			12.0859			0.01891	0.00214	2.22917e-05
220	CASNIG-C-220-6	Crushed	Dissolution 2	192		12.0834			12.0834			0.01649	0.00242	2.52083e-05
220	CASNIG-C-220-6	Crushed	Dissolution 3	288		12.0821			12.0821			0.01519	0.0013	1.35417e-05
220	CASNIG-C-220-6	Crushed	Dissolution 4	432		12.0766			12.0766			0.00968	0.00551	5.73958e-05
180	CASNIG-C-180-1	Crushed	Empty			12.2436			12.2436
180	CASNIG-C-180-1	Crushed	Sample mass	0		12.2467			12.2467			0.00303
180	CASNIG-C-180-1	Crushed	Dissolution 1	72		12.2468			12.2468			0.00319	-0.00016	-1.33333e-05
180	CASNIG-C-180-1	Crushed	Dissolution 2	144		12.2471			12.2471			0.00343	-0.00024	-2e-05
180	CASNIG-C-180-2	Crushed	Empty			12.1523			12.1523
180	CASNIG-C-180-2	Crushed	Sample mass	0		12.1569			12.1569			0.00455
180	CASNIG-C-180-2	Crushed	Dissolution 1	72		12.157			12.157			0.00468	-0.00013	-1.08333e-05
180	CASNIG-C-180-2	Crushed	Dissolution 2	144		12.1579			12.1579			0.00553	-0.00085	-7.08333e-05
200	CASNIG-C-200-1	Crushed	Empty			12.19			12.19
200	CASNIG-C-200-1	Crushed	Sample mass	0		12.1961			12.1961			0.00615
200	CASNIG-C-200-1	Crushed	Dissolution 1	72		12.1963			12.1963			0.00634	-0.00019	-1.58333e-05
200	CASNIG-C-200-1	Crushed	Dissolution 2	144		12.1965			12.1965			0.00656	-0.00022	-1.83333e-05
200	CASNIG-C-200-2	Crushed	Empty			12.0639			12.0639
200	CASNIG-C-200-2	Crushed	Sample mass	0		12.0694			12.0694			0.00548
200	CASNIG-C-200-2	Crushed	Dissolution 1	72		12.0692			12.0692			0.00524	0.00024	2e-05
200	CASNIG-C-200-2	Crushed	Dissolution 2	144		12.0693			12.0693			0.0054	-0.00016	-1.33333e-05

## Sheet: References
Jaffey, A.H., Flynn, K.F., Glendenin, L.E., Bentley, W. t, Essling, A.M., 1971. Precision measurement of half-lives and specific activities of U 235 and U 238. Physical review C 4, 1889.
Schmitz, M.D., Schoene, B., 2007. Derivation of isotope ratios, errors, and error correlations for U-Pb geochronology using 205Pb-235U-(233U)-spiked isotope dilution thermal ionization mass spectrometric data. Geochemistry, Geophysics, Geosystems 8.
Stacey, J.T, Kramers, J.D, 1975. Approximation of terrestrial lead isotope evolution by a two-stage model. Earth and planetary science letters 26, 207–221.
